# Supplementary material
Source: ML conference proceedings conference paper supplement (https://proceedings.mlr.press/v48/gaoa16.html)
Supplement: Supplementary file [file gaoa16-supp.pdf]

SUPPLEMENT TO “EXACT EXPONENT IN OPTIMAL RATES FOR  
CROWDSOURCING”

Chao Gao, Yu Lu and Dengyong Zhou

## A Proof of Corollary 3.1

*Proof.* Under the assumption that  $mI(\pi) \rightarrow \infty$ , the upper bound is a special case of Theorem 3.1. Note that

$$\begin{aligned} I(\pi) &= - \min_{0 \leq t \leq 1} \frac{1}{m} \sum_{i=1}^m \log (p_i^{1-t}(1-p_i)^t + p_i^{1-t}(1-p_i)^t) \\ &= - \frac{1}{m} \sum_{i=1}^m \log \left( 2\sqrt{p_i(1-p_i)} \right) \\ &= I(p). \end{aligned}$$

We focus on the proof of the lower bound, which involves weaker assumptions than that of Theorem 3.1. Using a similar analysis as (15)-(16), we have

$$\begin{aligned} &\inf_{\hat{y}} \sup_{y \in \{1,2\}^n} \mathbb{E}L(\hat{y}, y) \\ &\geq \frac{1}{n} \sum_{j=1}^n \inf_{\hat{y}_j} \left[ \frac{1}{2} \mathbb{P}_1\{\hat{y}_j = 2\} + \frac{1}{2} \mathbb{P}_2\{\hat{y}_j = 1\} \right]. \end{aligned}$$

Following the proof of Theorem 3.1 with the confusion matrix  $\pi^{(i)}$  replaced by (5), we have

$$\begin{aligned} &\inf_{\hat{y}_j} \left[ \frac{1}{2} \mathbb{P}_1\{\hat{y}_j = 2\} + \frac{1}{2} \mathbb{P}_2\{\hat{y}_j = 1\} \right] \\ &\geq \exp(-mI(p)) e^{-L} \mathbb{Q}(0 < S_m < L), \end{aligned}$$

where  $S_m = \sum_{i \in [m]} W_i$ , and under the distribution  $\mathbb{Q}$ ,

$$\mathbb{Q}_i \left( W_i = \frac{1}{2} \log \frac{1-p_i}{p_i} \right) = \mathbb{Q}_i \left( W_i = \frac{1}{2} \log \frac{p_i}{1-p_i} \right) = \frac{1}{2}.$$

Therefore,  $S_m$  has a symmetric distribution around 0. Letting  $L = 2\sqrt{\text{Var}_{\mathbb{Q}}(S_m)}$ , we have

$$\mathbb{Q}(0 < S_m < L) \geq \frac{1}{2} - \mathbb{Q}(S_m \geq L) \geq \frac{1}{2} - \frac{\text{Var}_{\mathbb{Q}}(S_m)}{L^2} \geq \frac{1}{4}.$$

Finally, we need to show that  $L = o(mI(p))$ . We claim that

$$\begin{aligned} &\sum_{i=1}^m \text{Var}_{\mathbb{Q}} W_i = \frac{1}{4} \sum_{i=1}^m \left( \log \frac{1-p_i}{p_i} \right)^2 \\ &\leq -8 \max_{1 \leq i \leq m} (|\log(p_i)| \vee |\log(1-p_i)| \vee 2) \\ &\quad \sum_{i=1}^m \log \left( 2\sqrt{p_i(1-p_i)} \right). \end{aligned}$$

This is because when  $p_i \in [1/16, 15/16]$ , we have  $\left| \log \frac{1-p_i}{p_i} \right|^2 \leq 6(2p_i-1)^2 \leq -6 \log(4p_i(1-p_i))$ . When  $p_i \in (0, 1/16) \cup (15/16, 1)$ ,  $\left| \log \frac{1-p_i}{p_i} \right| \leq -2 \log(4p_i(1-p_i))$  and  $\left| \log \frac{1-p_i}{p_i} \right| \leq 2|\log(p_i)| \vee 2|\log(1-p_i)|$ . Therefore, under the assumption that

$$\max_{1 \leq i \leq m} (|\log(p_i)| \vee |\log(1-p_i)|) = o(mI(p)),$$

$L = o(mI(p))$  holds, and the proof is complete.  $\square$

## B Proof of Lemma 6.1

Let  $f(t) = \sum_{i=1}^m \log B_t(\pi_{1*}^{(i)}, \pi_{2*}^{(i)})$ . Then we have  $f'(t_0) = 0$  by its definition. First, we are going to prove  $0 < t_0 < 1$ . The concavity of logarithm gives us  $x^t y^{1-t} \leq tx + (1-t)y$  for non-negative  $x, y$  and  $t \in [0, 1]$ , which implies

$$f(t) = \sum_{i \in [m]} \log B_t(\pi_{1*}^{(i)}, \pi_{2*}^{(i)}) \leq \sum_{i \in [m]} \log \left( \sum_{h=1}^k \left( (1-t)\pi_{1h}^{(i)} + t\pi_{2h}^{(i)} \right) \right) = 0.$$

For  $t \in (0, 1)$ , the equality holds if and only if  $\pi_{1h}^{(i)} = \pi_{2h}^{(i)}$  for all  $h \in [k]$  and  $i \in [m]$ . As there is at least one non-spammer, we must have  $f(t) < 0 = f(0) = f(1)$  for  $t \in (0, 1)$ . Hence the minimizer  $t_0 \in (0, 1)$ .

Now we are going to show the uniqueness of  $t_0$  by proving that

$$f''(t) = \text{Var}(S_m) > 0, \quad \forall t \in (0, 1)$$

where  $S_m = \sum_{i \in [m]} W_i$ . To simplify the notation, let us define  $w_{ih} = t \log \left( \frac{\pi_{2h}^{(i)}}{\pi_{1h}^{(i)}} \right)$  and  $p_{ih} = \left( \pi_{1h}^{(i)} \right)^{1-t} \left( \pi_{2h}^{(i)} \right)^t$  for all  $i \in [m]$  and  $h \in [k]$ . Now  $\mathbb{Q}_i(W_i = w_{ih}) = p_{ih} / \sum_h p_{ih}$  and  $B_t(\pi_{1*}^{(i)}, \pi_{2*}^{(i)}) = \sum_{h \in [k]} p_{ih}$ . Notice that  $\frac{d}{dt} p_{ih} = p_{ih} w_{ih}$ , we have

$$\frac{d}{dt} f(t) = \sum_{i \in [m]} \frac{\sum_h p_{ih} w_{ih}}{\sum_h p_{ih}} = \sum_{i \in [m]} \mathbb{E} W_i = \mathbb{E} S_m, \quad (19)$$

and

$$\frac{d^2}{dt^2} f(t) = \sum_{i \in [m]} \frac{\sum_h p_{ih} w_{ih}^2 \sum_h p_{ih} - (\sum_h p_{ih} w_{ih})^2}{(\sum_h p_{ih})^2} = \sum_{i \in [m]} \text{Var}(W_i) = \text{Var}(S_m). \quad (20)$$

Since the set  $\mathcal{A}_\alpha$  is non-empty, there is at least one  $\text{Var}(W_i) > 0$ . Thus,  $f''(t) = \text{Var}(S_m) > 0$ .

## C Proof of Lemma 6.2

From (19), we know  $\mathbb{E} S_m = f'(t_0) = 0$ . Since  $t_0 > 0$  by lemma 6.1, we can rescale  $W_i$  by  $W_i / (-t_0 \log \rho_m)$  and the value of  $S_m / \sqrt{\text{Var}(S_m)}$  will not change. Let us define  $V_i =$

$W_i/(-t_0 \log \rho_m)$  and  $R_m = \sum_{i=1}^m V_i$ . Then we have  $|V_i| \leq 1$ . To prove a central limit theorem of  $S_m$ , it is sufficient to check the following Lindeberg's condition [? ], that is, for any  $\epsilon > 0$ ,

$$\frac{1}{\text{Var}(R_m)} \sum_{i=1}^m \mathbb{E} \left( (V_i - \mathbb{E}V_i)^2 \mathbf{I}\{(V_i - \mathbb{E}V_i)^2 \geq \epsilon^2 \text{Var}(R_m)\} \right) \rightarrow 0 \text{ as } m \rightarrow \infty. \quad (21)$$

Note that for a discrete random variable  $X$  who takes value  $x_a$  with probability  $p_a$  for  $a \in [N]$ ,

$$\text{Var}(X) = \left( \sum_a p_a \right) \left( \sum_a p_a x_a^2 \right) - \left( \sum_a p_a x_a \right)^2 = \sum_{a,b} p_a p_b (x_a - x_b)^2.$$

Then, for any  $i \in \mathcal{A}_\alpha$ , we have

$$\begin{aligned} \text{Var}(V_i) &= \frac{1}{\log^2 \rho_m} \sum_{a,b} \frac{\left( \pi_{1a}^{(i)} \pi_{1b}^{(i)} \right)^{1-t} \left( \pi_{2a}^{(i)} \pi_{2b}^{(i)} \right)^t}{B_t^2(\pi_{1*}^{(i)}, \pi_{2*}^{(i)})} \log^2 \left( \frac{\pi_{2a}^{(i)} \pi_{1b}^{(i)}}{\pi_{1a}^{(i)} \pi_{2b}^{(i)}} \right) \\ &\geq \frac{1}{\log^2 \rho_m} \left( \pi_{12}^{(i)} \pi_{11}^{(i)} \right)^{1-t} \left( \pi_{22}^{(i)} \pi_{21}^{(i)} \right)^t \log^2 \left( \frac{\pi_{22}^{(i)} \pi_{11}^{(i)}}{\pi_{12}^{(i)} \pi_{21}^{(i)}} \right) \\ &\geq \frac{1}{\log^2 \rho_m} \left( \pi_{12}^{(i)} \pi_{11}^{(i)} \right)^{1-t} \left( \pi_{22}^{(i)} \pi_{21}^{(i)} \right)^t \log^2 ((1 + \alpha)^2) \\ &\geq \frac{\rho_m^2}{\log^2 \rho_m} 4 \log^2(1 + \alpha) \\ &\geq \frac{\rho_m^2}{\log^2 \rho_m} \min\{\alpha^2, 1\}. \end{aligned}$$

Here the second inequality is due to the assumption that for any  $i \in \mathcal{A}$ ,  $\pi_{aa}^{(i)} \geq \pi_{ab}^{(i)}(1 + \alpha)$  for any  $b \neq a$ . We have used the assumption that  $\pi_{ab}^{(i)} \geq \rho_m$  for the third inequality. The last inequality is because  $\log(1 + \alpha) \geq \alpha/(1 + \alpha) \geq \min\{\alpha/2, 1/2\}$  for positive  $\alpha$ . Take a sum of  $\text{Var}(V_i)$  over  $i \in \mathcal{A}_\alpha$ ,

$$\text{Var}(R_m) = \sum_{i \in [m]} \text{Var}(V_i) \geq |\mathcal{A}_\alpha| \frac{\rho_m^2}{\log^2 \rho_m} \min\{\alpha^2, 1\} \geq cm \frac{\rho_m^2}{\log^2 \rho_m} \min\{\alpha^2, 1\},$$

for some constant  $c \in (0, 1)$ . Since  $(V_i - \mathbb{E}V_i)^2 \leq 2V_i^2 + 2(\mathbb{E}V_i)^2 \leq 4$ , we will have

$$\mathbf{I}\{(V_i - \mathbb{E}V_i)^2 \geq \epsilon^2 \text{Var}(R_m)\} = 0$$

when  $4 \log^2 \rho_m < \epsilon^2 |\mathcal{A}_\alpha| \rho_m^2 \min\{\alpha^2, 1\}$ . Notice that  $\mathbb{E}(V_i - \mathbb{E}V_i)^2 \leq 4$ , we apply the Dominated Convergence Theorem to conclude

$$\mathbb{E} \left( (V_i - \mathbb{E}V_i)^2 \mathbf{I}\{(V_i - \mathbb{E}V_i)^2 \geq \epsilon^2 \text{Var}(R_m)\} \right) \rightarrow 0.$$

Thus, the Lindeberg condition holds when  $|\log \rho_m| = o(\rho_m |\mathcal{A}_{0.01}|^{1/2})$ .

## D Proof of Lemma 6.3

We are first going to show  $\lambda_0 \leq -2 \log \rho_m$ . Recall that

$$f(\lambda) = \prod_{i=1}^m \left( (1-p_i)e^{\lambda/2} + p_i e^{-\lambda/2} \right).$$

For all  $\lambda \geq -2 \log \rho_m$ , we have  $f(\lambda) > \rho_m^{-m} \prod_{i=1}^m (1-p_i) \geq 1$ , and  $f(0) = 1$ . Thus, the minimizer of  $f(\lambda)$  must be in the interval  $(0, -2 \log \rho_m]$ .

Again, we are going to prove the central limit theorem of  $S_m$  by checking the following Lindeberg's condition. For any  $\epsilon > 0$ ,

$$\lim_{m \rightarrow \infty} \frac{1}{\text{Var}_{\mathbb{Q}}(S_m)} \sum_{i=1}^m \mathbb{E}_{\mathbb{Q}} \left[ (W_i - \mathbb{E}_{\mathbb{Q}} W_i)^2 \mathbf{I} \left\{ |W_i - \mathbb{E}_{\mathbb{Q}} W_i| > \epsilon \sqrt{\text{Var}_{\mathbb{Q}}(S_m)} \right\} \right] = 0 \quad (22)$$

When  $\lambda_0 \in (0, -2 \log \rho_m]$ , a lower bound of  $\text{Var}_{\mathbb{Q}}(W_i)$  is given by

$$\text{Var}_{\mathbb{Q}}(W_i) = \lambda_0^2 \frac{p_i(1-p_i)}{\left( (1-p_i)e^{\lambda_0/2} + p_i e^{-\lambda_0/2} \right)^2} \geq \lambda_0^2 e^{-\lambda} p_i(1-p_i) \geq \lambda_0^2 \rho_m^2 p_i(1-p_i)$$

Therefore,  $\text{Var}_{\mathbb{Q}}(S_m) = \sum_{i=1}^m \text{Var}_{\mathbb{Q}}(W_i) \geq \lambda_0^2 \rho_m^2 \sum_{i \in [m]} p_i(1-p_i)$ . Notice that  $|W_i - \mathbb{E}_{\mathbb{Q}} W_i| \leq |W_i| + \mathbb{E}|W_i| = \lambda$ , for any fixed  $\epsilon > 0$ , we will have

$$\mathbf{I} \left\{ |W_i - \mathbb{E}_{\mathbb{Q}} W_i| > \epsilon \sqrt{\text{Var}_{\mathbb{Q}}(S_m)} \right\} = 0$$

when  $\rho_m^2 \sum_{i \in [m]} p_i(1-p_i) \rightarrow \infty$  as  $m \rightarrow \infty$ . Since  $\text{Var}_{\mathbb{Q}}(W_i)/\lambda_0^2 \leq 1/4$ , the Dominated Convergence Theorem implies the desired Lindeberg's condition (22).
